# Supplementary material for: Ma2/d promotes myonuclear positioning and association with the sarcoplasmic reticulum
Source: Oxford University Press journal article supplement (doi:10.1242/dev.159558), 2018-08-09
Supplement: dev159558supp.pdf [file dev159558supp.pdf]

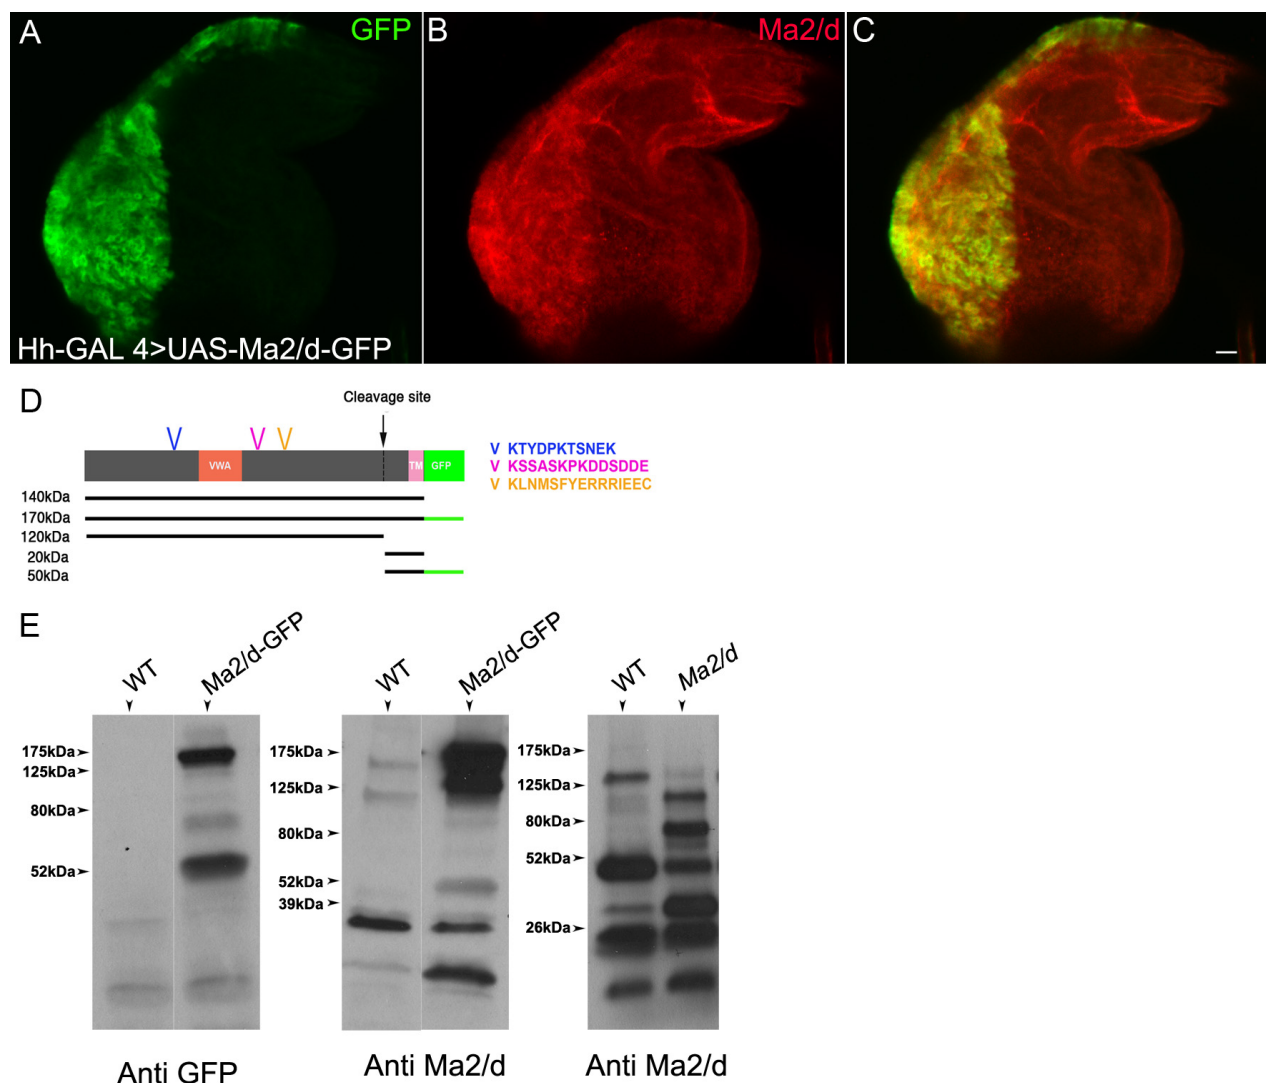

### Figure S1: Verification of anti Ma2/d specificity

A-C: Wing imaginal disc of larvae over expressing Ma2/d-GFP driven by Hh-GAL4, labeled with anti GFP (A) and anti Ma2/d antibody raised against 3 peptides (marked in D) of the extracellular domain of Ma2/d, indicating that the antibody recognizes the Ma2/d. (E) Western analysis: Left panel - Western blot of larval protein extract from wild type (WT) or larvae expressing Ma2/d-GFP in muscles (driven by *mef2*-GAL4) reacted with anti GFP. Two specific bands representing un-cleaved Ma2/d-GFP (~170kDa) and cleaved Ma2/d-GFP (~ 50kDa) are shown; The anti GFP is not expected to recognize the cleaved 120kDa polypeptide. Middle panel: Western blot of larval protein extract from WT (left lane), and larvae expressing Ma2/d-GFP in

muscles (right lane), both reacted with anti Ma2/d ab . In the lane of extract expressing Ma2/d-GFP the antibody recognizes a 170kDa band corresponding to the intact 170kDa protein and 120kDa band corresponding to the larger portion of the cleaved protein. In the wild type larvae extract this antibody recognizes a ~140kDa corresponding to endogenous non-cleaved Ma2/d, and ~120kDa band corresponding to the larger portion of the cleaved polypeptide. In both lanes, the antibody is not expected to recognize the small-cleaved polypeptide. Right panel: Western blot of protein extract from WT (left lane) and *Ma2/d* (right lane) mutant larvae both reacted with anti Ma2/d. In the WT extract lane (left lane) the 140kDa band represents non-cleaved intact Ma2/d protein, which is missing from the extract of the mutant larvae (right lane). Instead two lower molecular weight bands, absent from WT lane, appear (~100kDa and ~75kDa), presumably corresponding to the truncated Ma2/d proteins.

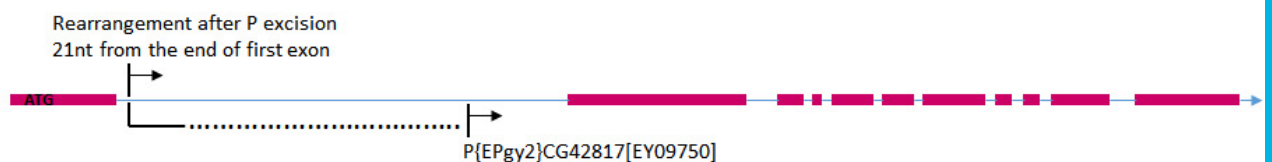

### Figure S2: Genomic map of EPgy2<sup>EY2EY09750</sup> excision

The genomic structure of *Ma2/d* is shown. The location of the original P element as well as the excised region deduced from sequence analysis is demonstrated.

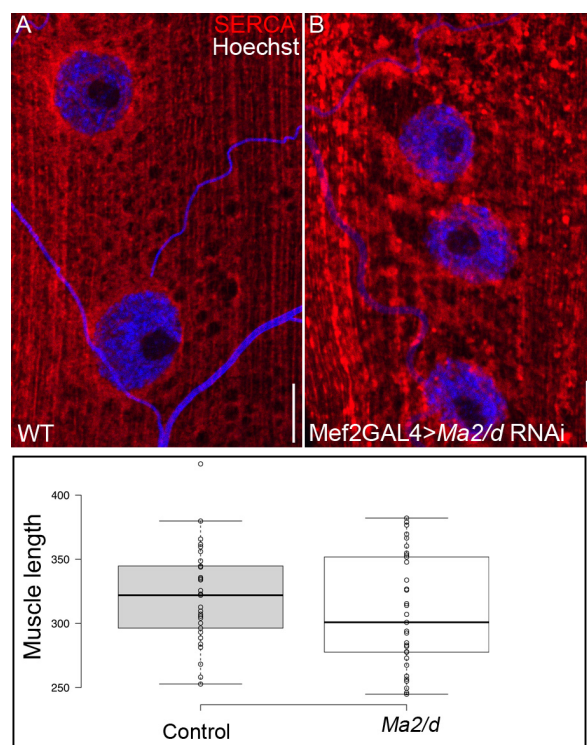

**Figure S3: Aberrant nuclear position in *Ma2d* knockdown muscles**

Larval muscles of wild type (A) or larvae expressing RNAi against *Ma2/d* (B) indicating a similar phenotype of aberrant nuclear position. Bar indicates 10 $\mu$ m. C – quantification of *Ma2/d* larval muscle length. No significant difference between the groups is observed (*t* test:  $p=0.115$ ; for WT – the length of 33 muscles (muscle 6) were measured from 4 larvae, and for *Ma2d* mutant 29 muscle (muscle 6) were measured from 4 larvae.

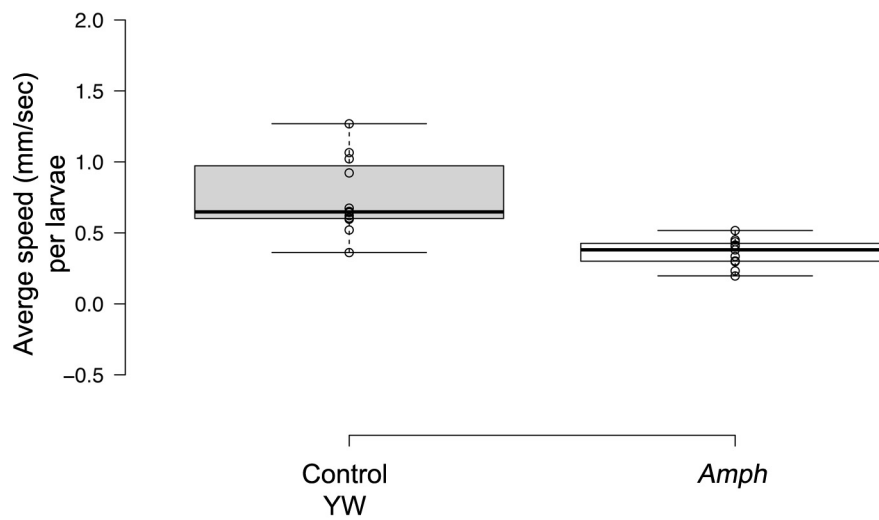

**Figure S4: Locomotion assay for *Amph* mutant larvae.**

Quantification of the locomotion of control (YW) and *Amph* mutant larvae. N=10 for each group. *t*-test:  $P < 0.0002$ .

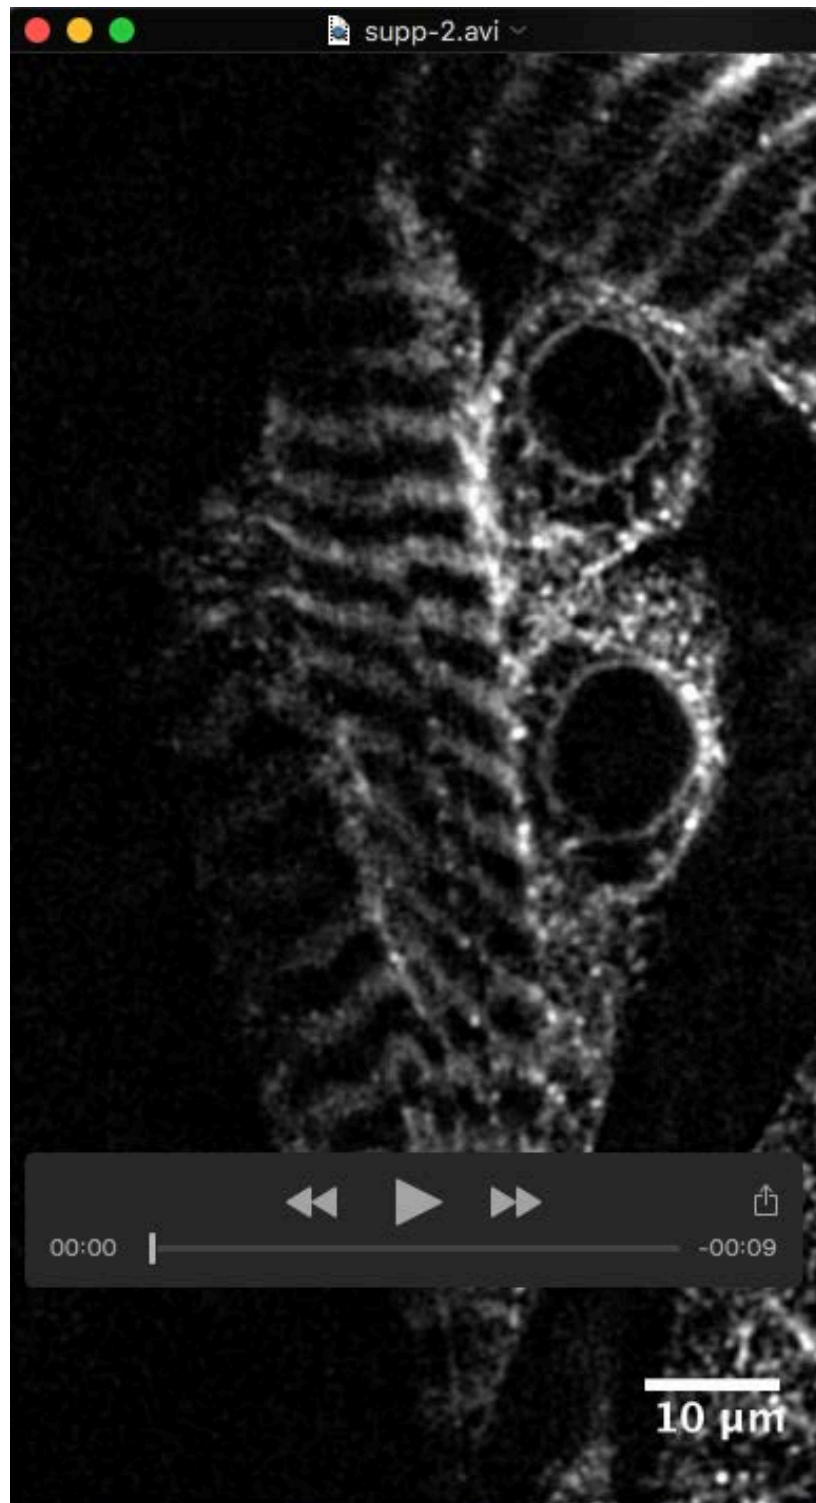

**Movie 1:** The distribution of Ma2/d-GFP in live 3<sup>rd</sup> instar larvae during muscle contraction imaged under Spinning disc microscope. Individual images of the movie are shown in Figure 5.

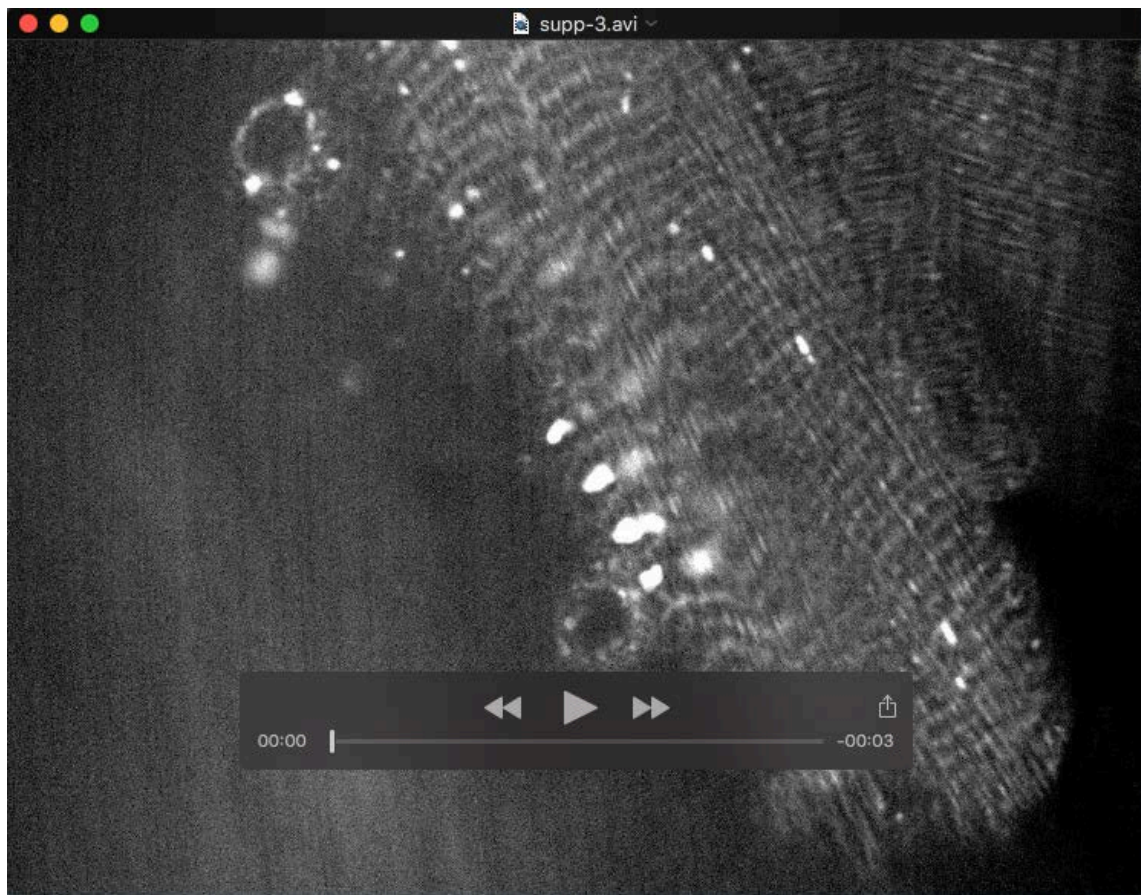

**Movie 2:** SERCA-Cherry distribution in live 3<sup>rd</sup> instar larvae during muscle contraction. Individual images of the movie are shown in Figure 5.



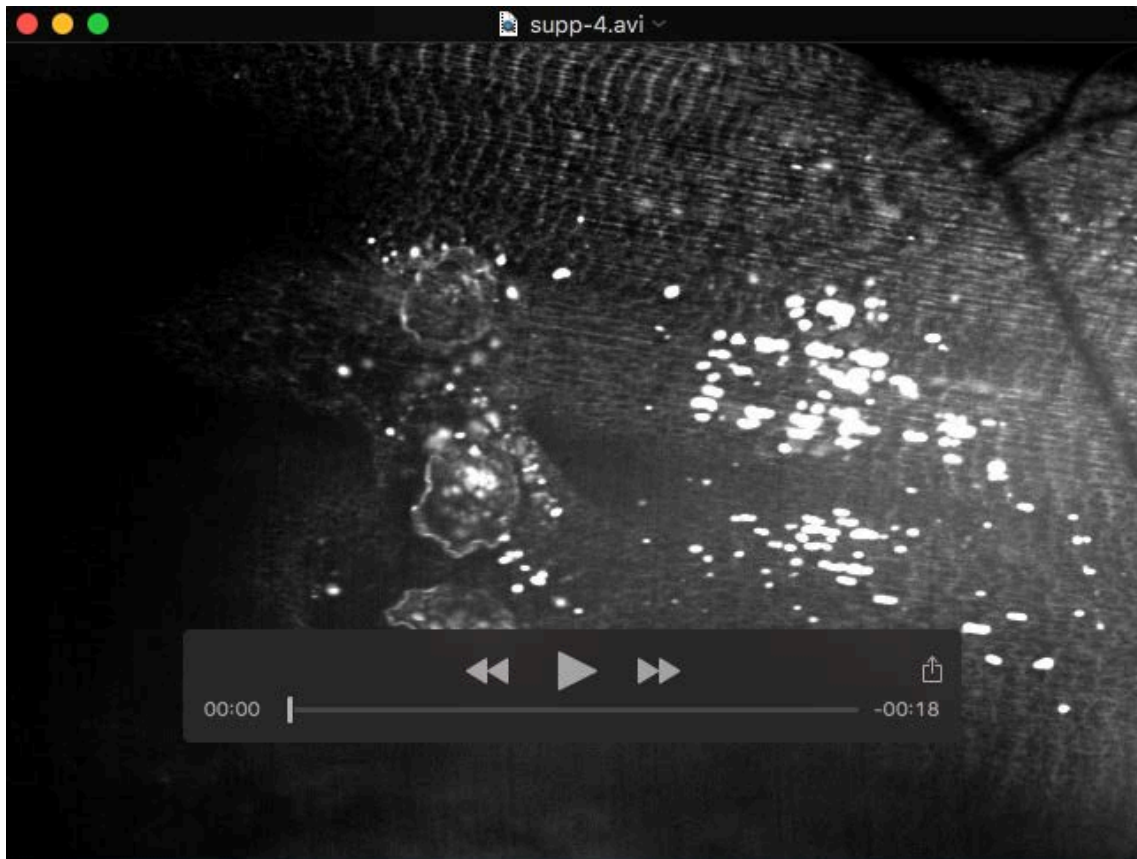

**Movie 3:** SERCA-Cherry distribution in live 3<sup>rd</sup> instar larvae mutant for *Ma2/d* during muscle contraction. Individual images of the movie are shown in Figure 5.
